# Supplementary material for: Ex Vivo Model to Assess the Exposure of Patients to Plasticizers from Medical Devices during Pre-CAR-T Cells’ Apheresis
Source: MDPI journal article supplement (doi:10.3390/toxics10020079), 2022-02-08
Supplement: s1 [file s1]

# Supplementary Materials: Ex Vivo Model to Assess the Exposure of Patients to Plasticizers from Medical Devices During Pre-CAR-T Cells' Apheresis

Raphaëlle Lautraite, Lise Bernard, Pascale Halle, Philip Chennell, Yoann Le Basle, Justyna Kanold and Valérie Sautou

**Table S1.** Raw data of the quantification of plasticizer in the different sections of the apheresis set, and in the anticoagulant bag.

| MD            | location of cut         | sample detail for screening | Plasticizer identification | Plasticizer technical file | sample mass for identification | Major plasticizer Concentrations (µg/mL) | Major plasticizer Concentrations Mean (µg/mL) | SD         | CV (%)  | Major plasticizer content (g/100g) | Major plasticizer content Mean (g/100g) | SD           | CV (%)    | Minor plasticizer concentration (µg/mL) |
|---------------|-------------------------|-----------------------------|----------------------------|----------------------------|--------------------------------|------------------------------------------|-----------------------------------------------|------------|---------|------------------------------------|-----------------------------------------|--------------|-----------|-----------------------------------------|
| Apheresis set | Inlet line (1)          | section 1                   | 10.4                       | DEHP                       | DEHP                           | 11                                       | 165                                           |            |         | 37.5                               |                                         |              |           |                                         |
|               |                         |                             |                            |                            |                                | 10.7                                     | 165                                           | 156.166666 | 15.2997 | 9.80                               | 38.5514036                              | 892132.03255 | 5.50      | /                                       |
|               |                         |                             |                            |                            |                                | 10                                       | 138.5                                         |            |         | 187                                | 396                                     | 597          | %         |                                         |
|               |                         | section 2                   | 10.8                       | DEHP                       | DEHP                           | 10.9                                     | 164                                           | 149.666666 | 12.4230 | 8.30                               | 32.2727234                              | 2872.81370   | 8.20      | /                                       |
|               |                         |                             |                            |                            |                                |                                          |                                               |            |         |                                    |                                         |              |           |                                         |
|               |                         | section 3                   | 10.5                       | DEHP +BBP                  | DEHP                           | 10.7                                     | 143                                           | 149.666666 | 12.4230 | 8.30                               | 32.2727234                              | 2872.81370   | 8.20      | /                                       |
|               |                         |                             |                            |                            |                                |                                          |                                               |            |         |                                    |                                         |              |           |                                         |
|               | Orange                  | section 1                   | 10.4                       | DEHP                       | DEHP                           | 10.9                                     | 168.8                                         |            |         | 38.71559                           |                                         |              |           | < LOQ                                   |
|               |                         |                             |                            |                            |                                | 10.4                                     | 163.6                                         | 165.6      | 2.8     | 1.70                               | 39.3269239                              | 445541.93641 | 4.90      | < LOQ                                   |
|               |                         |                             |                            |                            |                                | 10.2                                     | 164.4                                         |            |         | 40.29411                           |                                         |              |           | < LOQ                                   |
|               |                         | section 2                   | 10.9                       | DEHP                       | DEHP                           | 10.5                                     | 175.2                                         | 173.333333 | 11.9102 | 6.90                               | 41.71428                                | 571          | 40.552563 | 61453                                   |
|               |                         |                             |                            |                            |                                |                                          |                                               |            |         |                                    |                                         |              |           |                                         |
| Apheresis set | Inlet line manifold (3) | section 1                   | 10.4                       | DEHP                       | DEHP                           | 10.9                                     | 168.8                                         |            |         | 38.71559                           |                                         |              |           | < LOQ                                   |
|               |                         |                             |                            |                            |                                | 10.4                                     | 163.6                                         | 165.6      | 2.8     | 1.70                               | 39.3269239                              | 445541.93641 | 4.90      | < LOQ                                   |
|               |                         |                             |                            |                            |                                | 10.2                                     | 164.4                                         |            |         | 40.29411                           |                                         |              |           | < LOQ                                   |
|               |                         | section 2                   | 10.9                       | DEHP                       | DEHP                           | 10.5                                     | 175.2                                         | 173.333333 | 11.9102 | 6.90                               | 41.71428                                | 571          | 40.552563 | 61453                                   |
|               |                         |                             |                            |                            |                                |                                          |                                               |            |         |                                    |                                         |              |           |                                         |
|               | green                   | section 1                   | 10.4                       | DEHP                       | DEHP                           | 10.9                                     | 168.8                                         |            |         | 38.71559                           |                                         |              |           | < LOQ                                   |
|               |                         |                             |                            |                            |                                | 10.4                                     | 163.6                                         | 165.6      | 2.8     | 1.70                               | 39.3269239                              | 445541.93641 | 4.90      | < LOQ                                   |
|               |                         |                             |                            |                            |                                | 10.2                                     | 164.4                                         |            |         | 40.29411                           |                                         |              |           | < LOQ                                   |
|               |                         | section 2                   | 10.9                       | DEHP                       | DEHP                           | 10.5                                     | 175.2                                         | 173.333333 | 11.9102 | 6.90                               | 41.71428                                | 571          | 40.552563 | 61453                                   |
|               |                         |                             |                            |                            |                                |                                          |                                               |            |         |                                    |                                         |              |           |                                         |
| Apheresis set | Return line (6)         | section 1                   | 10.4                       | DEHP                       | DEHP                           | 10.9                                     | 168.8                                         |            |         | 38.71559                           |                                         |              |           | < LOQ                                   |
|               |                         |                             |                            |                            |                                | 10.4                                     | 163.6                                         | 165.6      | 2.8     | 1.70                               | 39.3269239                              | 445541.93641 | 4.90      | < LOQ                                   |
|               |                         |                             |                            |                            |                                | 10.2                                     | 164.4                                         |            |         | 40.29411                           |                                         |              |           | < LOQ                                   |
|               |                         | section 2                   | 10.9                       | DEHP                       | DEHP                           | 10.5                                     | 175.2                                         | 173.333333 | 11.9102 | 6.90                               | 41.71428                                | 571          | 40.552563 | 61453                                   |
|               |                         |                             |                            |                            |                                |                                          |                                               |            |         |                                    |                                         |              |           |                                         |
|               | Return line (6)         | section 1                   | 10.4                       | DEHP                       | DEHP                           | 10.9                                     | 168.8                                         |            |         | 38.71559                           |                                         |              |           | < LOQ                                   |
|               |                         |                             |                            |                            |                                | 10.4                                     | 163.6                                         | 165.6      | 2.8     | 1.70                               | 39.3269239                              | 445541.93641 | 4.90      | < LOQ                                   |
|               |                         |                             |                            |                            |                                | 10.2                                     | 164.4                                         |            |         | 40.29411                           |                                         |              |           | < LOQ                                   |
|               |                         | section 2                   | 10.9                       | DEHP                       | DEHP                           | 10.5                                     | 175.2                                         | 173.333333 | 11.9102 | 6.90                               | 41.71428                                | 571          | 40.552563 | 61453                                   |
|               |                         |                             |                            |                            |                                |                                          |                                               |            |         |                                    |                                         |              |           |                                         |

|                                       |                |                         |                         |      |       |            |                |                |                 |                         |                 |                |           |       |   |
|---------------------------------------|----------------|-------------------------|-------------------------|------|-------|------------|----------------|----------------|-----------------|-------------------------|-----------------|----------------|-----------|-------|---|
| Manifold<br>to<br>channel<br>(24)     | white<br>1     | 10.4                    | DEHP                    | DEHP | 10.8  | 128.2      | 121.75         | 2.10158<br>67  | 1.70<br>%       | 29.67592<br>593         |                 |                |           | < LOQ | / |
|                                       |                |                         |                         |      | 10.3  | 122        |                |                |                 | 29.61165<br>049         |                 |                |           |       |   |
|                                       |                |                         |                         |      | 10.5  | 119.5      |                |                |                 | 28.4523829.059190.52541 | 07              | 719            | %         |       |   |
|                                       |                |                         |                         |      | 10.6  | 124.5      |                |                |                 | 29.36320<br>755         |                 |                |           |       |   |
|                                       | white<br>2     | 10.9                    | DEHP +<br>DEHA<br>(min) | DEHP | 10.9  | 121.2      | 122.4          | 4.13279<br>566 | 3.40<br>%       | 27.79816<br>514         |                 |                |           | < LOQ |   |
|                                       |                |                         |                         |      | 10.6  | 127        |                |                |                 | 29.9528328.694771.12188 | 622             | 506            | %         | < LOQ |   |
|                                       |                |                         |                         |      | 10.5  | 119        |                |                |                 | 28.333333<br>333        |                 |                |           | < LOQ |   |
|                                       | pink           | 10.8                    | DEHP +<br>DEHA<br>(min) | DEHP | 10.8  | 139.6      | 136.133333     | 8.92038<br>863 | 6.60<br>%       | 32.31481<br>481         |                 |                |           | < LOQ |   |
|                                       |                |                         |                         |      | 10.4  | 126        |                |                |                 | 30.2884631.989251.56364 | 411             | 124            | %         | < LOQ |   |
|                                       |                |                         |                         |      | 10.7  | 142.8      |                |                |                 | 33.36448<br>598         |                 |                |           | < LOQ |   |
|                                       | yellow<br>w    | 10.2                    | DEHP +<br>DEHA<br>(min) | DEHP | 10.5  | 108.2      | 119.066666     | 10.2256<br>214 | 8.60<br>%       | 25.76190<br>476         |                 |                |           | < LOQ |   |
|                                       |                |                         |                         |      | 11    | 120.5      |                |                |                 | 27.3863627.450931.72222 | 795             | 853            | %         | < LOQ |   |
|                                       |                |                         |                         |      | 11    | 128.5      |                |                |                 | 29.20454<br>545         |                 |                |           | < LOQ |   |
| Return<br>line<br>manifold<br>(8)     | white          | 10                      | DEHP                    | DEHP | 11    | 127        | 130.333333     | 7.57187<br>779 | 5.80<br>%       | 28.86363<br>636         |                 |                |           |       | / |
|                                       |                |                         |                         |      | 10.2  | 125        |                |                |                 | 30.6372530.558931.65753 | 906             | 298            | %         |       |   |
|                                       |                |                         |                         |      | 10.8  | 139        |                |                |                 | 32.17592<br>593         |                 |                |           |       |   |
|                                       | green          | 10.2                    | DEHP                    | DEHP | 10.6  | 130.2      | 131.133333     | 1.44683<br>563 | 1.10<br>%       | 30.70754<br>717         |                 |                |           |       |   |
|                                       |                |                         |                         |      | 10.3  | 130.4      |                |                |                 | 31.65048<br>544         | 31.12869        | 0.47945<br>944 | 1.50<br>% | /     |   |
|                                       |                |                         |                         |      | 10.7  | 132.8      |                |                |                 | 31.02803<br>738         |                 |                |           |       |   |
| Channel<br>(18)                       | 10.9           | DEHP<br>+BBP            | NA                      |      |       |            |                |                |                 |                         |                 |                |           |       |   |
|                                       | 10.5           | DEHP<br>+BBP            |                         |      |       |            |                |                |                 |                         |                 |                |           |       |   |
| Anticoag<br>ulant<br>(AC) line<br>(9) | 10.2           | DEHP +<br>DEHA<br>(min) | DEHP                    | 10   | 124.4 | 134.266666 | 12.1232<br>559 | 9.00<br>%      | 31.1            |                         |                 |                | < LOQ     |       |   |
|                                       |                |                         |                         | 10   | 130.6 |            |                |                | 32.65           | 32.446961.25780         | 97              | 484            | %         | < LOQ |   |
|                                       |                |                         |                         | 11   | 147.8 |            |                |                | 33.59090<br>909 |                         |                 |                | < LOQ     |       |   |
| Saline<br>line (10)                   | section<br>n 1 | 10.6                    | DEHP                    | DEHP | 10.5  | 243        | 245.833333     | 26.3644<br>331 | 10.7<br>0%      | 57.85714<br>286         |                 |                |           |       | / |
|                                       |                |                         |                         |      | 10.4  | 273.5      |                |                |                 | 65.7451959.435105.68771 | 182             | 77             | %         |       |   |
|                                       |                |                         |                         |      | 10.1  | 221        |                |                |                 | 54.70297<br>03          |                 |                |           |       |   |
|                                       | section<br>n 2 | 11                      | DEHP +<br>DEHA<br>(min) | DEHP | 10.1  | 145        | 144.333333     | 1.60727<br>513 | 1.10<br>%       | 35.89108<br>911         | 34.861421.55868 | 364            | 151       | %     | / |
|                                       |                |                         |                         |      | 10    | 142.5      |                |                |                 | 35.625                  |                 |                |           |       |   |

|                     |            |                   |                   |      |        |             |            |        |                |       |                  |  |  |        |       |  |  |
|---------------------|------------|-------------------|-------------------|------|--------|-------------|------------|--------|----------------|-------|------------------|--|--|--------|-------|--|--|
| collect line (25)   | 10.6       | DEHP + DEHA (min) | DEHP              | 11   | 145.5  | 103         | 6.42806347 | 6.20%  | 33.06818182    |       |                  |  |  | 3.90%  | < LOQ |  |  |
|                     |            |                   |                   | 10.3 | 106.2  |             |            |        | 25.77669903    |       |                  |  |  |        |       |  |  |
|                     |            |                   |                   | 10   | 95.6   |             |            |        | 24.98657097283 |       |                  |  |  |        |       |  |  |
|                     |            |                   |                   | 10.6 | 107.2  |             |            |        | 25.28301887    |       |                  |  |  |        |       |  |  |
|                     |            |                   |                   |      |        |             |            |        |                |       |                  |  |  |        |       |  |  |
| Collection bag (24) | Tubulue    | 10.7              | DEHP + DEHA (min) | ?    | BTHC   | 122.8333333 | 10.40833   | 8.50%  | 30.56818182    |       |                  |  |  | 7.60%  | < LOQ |  |  |
|                     |            |                   |                   |      |        |             |            |        | 11             | 134.5 | 26.2614628337872 |  |  |        |       |  |  |
|                     |            |                   |                   |      |        |             |            |        | 10.9           | 114.5 | 28.18396226      |  |  |        |       |  |  |
|                     |            |                   |                   |      |        |             |            |        | 10.6           | 119.5 | 28.18396226      |  |  |        |       |  |  |
|                     |            |                   |                   |      |        |             |            |        |                |       |                  |  |  |        |       |  |  |
| ACDA bag            | Spike port | /                 | 10.8              | DEHP | DEHP ? | 189.875     | 82.5775609 | 43.50% | 48.19711538    |       |                  |  |  | 44.40% | /     |  |  |
|                     |            |                   |                   |      |        |             |            |        | 50             |       |                  |  |  |        |       |  |  |
|                     |            |                   |                   |      |        |             |            |        | 27.18446602    |       |                  |  |  |        |       |  |  |
|                     |            |                   |                   |      |        |             |            |        | 68.80733945    |       |                  |  |  |        |       |  |  |
|                     |            |                   |                   |      |        |             |            |        | 29.35779656    |       |                  |  |  |        |       |  |  |
|                     |            |                   |                   |      |        |             |            |        | 817            |       |                  |  |  |        |       |  |  |
|                     |            |                   |                   |      |        |             |            |        | 78.75          |       |                  |  |  |        |       |  |  |
|                     |            |                   |                   |      |        |             |            |        | 38.57142857    |       |                  |  |  |        |       |  |  |
|                     |            |                   |                   |      |        |             |            |        | 22.52358491    |       |                  |  |  |        |       |  |  |
|                     |            |                   |                   |      |        |             |            |        |                |       |                  |  |  |        |       |  |  |
| Pocket              | /          | 10.8              | DEHP              | DEHP |        | 120         | 7.93725393 | 6.60%  | 29.71698113    |       |                  |  |  | 6.00%  | /     |  |  |
|                     |            |                   |                   |      |        |             |            |        | 10.7           | 123   | 28.7383128294621 |  |  |        |       |  |  |
|                     |            |                   |                   |      |        |             |            |        | 10.5           | 111   | 26.42857143      |  |  |        |       |  |  |

**Table S2.** Raw data of the quantification of DEHP released in the water/ethanol.

| Simulation Solution | Simulation Number | DEHP Concentration (µg/mL) | DEHP Concentration Mean (µg/mL) | SD   | CV    | DEHP dose (mg) | Exposure Dose (mg/kg/jour) | Concentration (µg/mL) Mean | SD          |
|---------------------|-------------------|----------------------------|---------------------------------|------|-------|----------------|----------------------------|----------------------------|-------------|
| Water/ethanol       | Simulation 1      | 17.16                      | 17.13                           | 0.7  | 4.09% | 85.67          | 1.22                       | 19.78                      | 2.588753454 |
|                     |                   | 17.82                      |                                 |      |       |                |                            | Dose (mg) Mean             |             |
|                     |                   | 16.42                      |                                 |      |       |                |                            | SD                         |             |
|                     | Simulation 2      | 19.86                      | 19.9                            | 0.09 | 0.44% | 99.5           | 1.42                       | 98.9                       | 12.94376727 |
|                     |                   | 20                         |                                 |      |       |                |                            | Exposure dose Mean         |             |
|                     |                   | 19.84                      |                                 |      |       |                |                            | SD                         |             |
|                     | Simulation 3      | 22.28                      | 22.31                           | 0.52 | 2.33% | 111.53         | 1.59                       | 1.41                       | 0.184910961 |
|                     |                   | 21.8                       |                                 |      |       |                |                            |                            |             |
|                     |                   | 22.84                      |                                 |      |       |                |                            |                            |             |
